# Supplementary material for: An overview of the osseous palmar sesamoid in Anura, with the particular case of some Rhinella species
Source: PeerJ journal article supplement (doi:10.7717/peerj.15063), 2023-05-15
Supplement: SM3.pdf [file SM3.pdf]

| TAXA                                   | Palmar sesamoid:<br>0=absent;<br>1=present | Level of the carpals<br>palmar surface:<br>0=concave;<br>1=protruded; 2= flat | Main habitat use:<br>0=terrestrial; 1=<br>aquatic;<br>2=arboreal |
|----------------------------------------|--------------------------------------------|-------------------------------------------------------------------------------|------------------------------------------------------------------|
| <i>Alytes obstetricans</i>             | 0                                          | 0                                                                             | 0                                                                |
| <i>Discoglossus pictus</i>             | 0                                          | 0                                                                             | 0                                                                |
| <i>Barbourula<br/>busuanguensis</i>    | 0                                          | 2                                                                             | 1                                                                |
| <i>Bombina maxima</i>                  | 0                                          | 2                                                                             | 0                                                                |
| <i>Xenopus clivii</i>                  | 0                                          | 2                                                                             | 1                                                                |
| <i>Xenopus borealis</i>                | 0                                          | 2                                                                             | 1                                                                |
| <i>Spea multiplicata</i>               | 0                                          | 0                                                                             | 0                                                                |
| <i>Scaphiopus<br/>holbrookii</i>       | 0                                          | 2                                                                             | 0                                                                |
| <i>Xenophrys major</i>                 | 0                                          | 0                                                                             | 1                                                                |
| <i>Brachytarsophrys<br/>carinensis</i> | 0                                          | 0                                                                             | 0                                                                |
| <i>Leptobranchium<br/>hasseltii</i>    | 1                                          | 0                                                                             | 0                                                                |
| <i>Pelobates varaldii</i>              | 0                                          | 0                                                                             | 0                                                                |
| <i>Pelobates fuscus</i>                | 0                                          | 2                                                                             | 0                                                                |
| <i>Pelodytes<br/>caucasicus</i>        | 0                                          | 2                                                                             | 0                                                                |
| <i>Ascaphus truei</i>                  | 0                                          | 2                                                                             | 1                                                                |
| <i>Ascaphus<br/>montanus</i>           | 0                                          | 2                                                                             | 1                                                                |
| <i>Leiopelma<br/>hamiltoni</i>         | 0                                          | 2                                                                             | 0                                                                |
| <i>Heleophrynae<br/>natalensis</i>     | 1                                          | 1                                                                             | 1                                                                |
| <i>Limnodynastes<br/>dorsalis</i>      | 0                                          | 0                                                                             | 0                                                                |
| <i>Crinia signifera</i>                | 1                                          | 0                                                                             | 0                                                                |
| <i>Mixophyes balbus</i>                | 0                                          | 0                                                                             | 0                                                                |
| <i>Rhinoderma<br/>darwini</i>          | 0                                          | 1                                                                             | 0                                                                |
| <i>Eusophus roseus</i>                 | 0                                          | 0                                                                             | 0                                                                |
| <i>Crossodactylus<br/>trachystomus</i> | 1                                          | 0                                                                             | 0                                                                |
| <i>Crossodactylus<br/>gaudichaudii</i> | 1                                          | 0                                                                             | 0                                                                |
| <i>Batrachyla<br/>taeniata</i>         | 0                                          | 0                                                                             | 0                                                                |
| <i>Hylorina sylvatica</i>              | 0                                          | 0                                                                             | 0                                                                |
| <i>Zachaenus<br/>parvulus</i>          | 1                                          | 0                                                                             | 0                                                                |
| <i>Thoropa miliaris</i>                | 0                                          | 0                                                                             | 0                                                                |
| <i>Cycloramphus<br/>asper</i>          | 1                                          | 0                                                                             | 0                                                                |
| <i>Telmatobius</i>                     | 0                                          | 1                                                                             | 1                                                                |

|                            |   |   |   |
|----------------------------|---|---|---|
| <i>thompsoni</i>           |   |   |   |
| <i>Lepidobatrachus</i>     | 0 | 0 | 0 |
| <i>laevis</i>              |   |   |   |
| <i>Ceratophrys aurita</i>  | 0 | 0 | 0 |
| <i>Allophryne rutveni</i>  | 0 | 0 | 2 |
| <i>Hyalinobatrachium</i>   | 0 | 0 | 2 |
| <i>fleischmanni</i>        |   |   |   |
| <i>Centrolene</i>          | 0 | 0 | 2 |
| <i>buckleyi</i>            |   |   |   |
| <i>Cryptobatrachus</i>     | 0 | 0 | 2 |
| <i>boulengeri</i>          |   |   |   |
| <i>Gastrotheca</i>         | 0 | 0 | 2 |
| <i>cornuta</i>             |   |   |   |
| <i>Gastrotheca</i>         | 0 | 0 | 2 |
| <i>peruana</i>             |   |   |   |
| <i>Stefania scalae</i>     | 0 | 0 | 2 |
| <i>Hemiphractus</i>        | 0 | 0 | 2 |
| <i>fasciatus</i>           |   |   |   |
| <i>Hemiphractus</i>        | 0 | 0 | 2 |
| <i>proboscideus</i>        |   |   |   |
| <i>Hemiphractus</i>        | 0 | 0 | 2 |
| <i>helioi</i>              |   |   |   |
| <i>Hyla chrysoscelis</i>   | 0 | 1 | 2 |
| <i>Hyla cinerea</i>        | 0 | 1 | 2 |
| <i>Hyla femoralis</i>      | 0 | 1 | 2 |
| <i>Hyla miliaria</i>       | 0 | 1 | 2 |
| <i>Hyla</i>                | 0 | 0 | 2 |
| <i>mixomaculata</i>        |   |   |   |
| <i>Hyla nephila</i>        | 0 | 0 | 2 |
| <i>Hyla salvage</i>        | 0 | 0 | 2 |
| <i>Nyctimantis</i>         | 0 | 0 | 2 |
| <i>rugiceps</i>            |   |   |   |
| <i>Hyla smithi</i>         | 0 | 0 | 2 |
| <i>Hyla velancifer</i>     | 0 | 0 | 2 |
| <i>Boana boans</i>         | 0 | 0 | 2 |
| <i>Acrys crepitans</i>     | 0 | 0 | 2 |
| <i>Acrys gryllus</i>       | 0 | 0 | 2 |
| <i>Anothea spinosa</i>     | 0 | 1 | 2 |
| <i>Aparasphenodon</i>      | 0 | 1 | 2 |
| <i>brunoi</i>              |   |   |   |
| <i>Argenteohyla</i>        | 0 | 1 | 2 |
| <i>siemersi</i>            |   |   |   |
| <i>Corythomantis</i>       | 0 | 1 | 2 |
| <i>greenngi</i>            |   |   |   |
| <i>Hyla andersonii</i>     | 0 | 1 | 2 |
| <i>Litoria aurea</i>       | 0 | 0 | 2 |
| <i>Phyllobates bicolor</i> | 1 | 0 | 0 |
| <i>Silverstoneia</i>       | 1 | 0 | 0 |
| <i>flotator</i>            |   |   |   |
| <i>Ameerega</i>            | 1 | 0 | 0 |

|                            |   |   |     |
|----------------------------|---|---|-----|
| <i>trivittatus</i>         |   |   |     |
| <i>Colostethus</i>         | 1 | 0 | 0   |
| <i>latinus</i>             |   |   |     |
| <i>Minyobates</i>          | 0 | 1 | 0   |
| <i>minutus</i>             |   |   |     |
| <i>Oophaga pumilio</i>     | 1 | 0 | 0   |
| <i>Brachycephalus</i>      | 1 | 0 | 0   |
| <i>curupira</i>            |   |   |     |
| <i>Brachycephalus</i>      | 1 | 0 | 0   |
| <i>ephippium</i>           |   |   |     |
| <i>Ischnocnema</i>         | 1 | 0 | 0   |
| <i>quixensis</i>           |   |   |     |
| <i>Ischnocnema</i>         | 1 | 0 | 0   |
| <i>gualteri</i>            |   |   |     |
| <i>Barycholos pulcher</i>  | 1 | 0 | 0   |
| <i>Craugastor laticeps</i> | 1 | 0 | 0   |
| <i>Odontophrynus</i>       | 1 | 0 | 0   |
| <i>americanus</i>          |   |   |     |
| <i>Procerathophrys</i>     | 0 | 0 | 0   |
| <i>bioei</i>               |   |   |     |
| <i>Macrogeniaglottus</i>   | 0 | 0 | 0   |
| <i>alipioi</i>             |   |   |     |
| <i>Adenomera</i>           | 1 | 0 | 0   |
| <i>andreae</i>             |   |   |     |
| <i>Anaxyrus terrestris</i> | 1 | 0 | 0   |
| <i>Anaxyrus fowleri</i>    | 1 | 0 | 0   |
| <i>Adenomus kelaartii</i>  | 1 | 0 | 0/2 |
| <i>Leptodactylus</i>       | 1 | 0 | 0   |
| <i>pentadactylus</i>       |   |   |     |
| <i>Melanophryniscus</i>    | 1 | 0 | 0   |
| <i>stelzneri</i>           |   |   |     |
| <i>Anaxyrus</i>            | 1 | 0 | 0   |
| <i>quercicus</i>           |   |   |     |
| <i>Ansonia mcgregori</i>   | 1 | 0 | 0   |
| <i>Atelopus</i>            | 1 | 0 | 0   |
| <i>oxyrhinchus</i>         |   |   |     |
| <i>Atelopus ignescens</i>  | 1 | 0 | 0   |
| <i>Duttaphrynus</i>        | 1 | 0 | 0   |
| <i>dodsoni</i>             |   |   |     |
| <i>Frostius</i>            | 1 | 1 | 2   |
| <i>pernambucensis</i>      |   |   |     |
| <i>Laurentophryne</i>      | 1 | 0 | 0   |
| <i>parkeri</i>             |   |   |     |
| <i>Mertensophryne</i>      | 1 | 0 | 0   |
| <i>micronotis</i>          |   |   |     |
| <i>Peltophryne</i>         | 1 | 0 | 0   |
| <i>guentheri</i>           |   |   |     |
| <i>Truebella tothastes</i> | 1 | 0 | 0   |
| <i>Truebella skoptes</i>   | 1 | 0 | 0   |
| <i>Capensibufo sp.</i>     | 1 | 0 | 0   |

|                           |   |   |     |
|---------------------------|---|---|-----|
| <i>Didynamipus</i>        | 1 | 0 | 0   |
| <i>sjostedi</i>           |   |   |     |
| <i>Rhinella dorbigni</i>  | 1 | 0 | 0   |
| <i>Rhinella dyptica</i>   | 1 | 0 | 0   |
| <i>Rhinella arenarum</i>  | 1 | 0 | 0   |
| <i>Rhinella</i>           | 1 | 0 | 0/2 |
| <i>margaritifera</i>      |   |   |     |
| <i>Nasikabatrachus</i>    | 0 | 1 | 0   |
| <i>sahyadrensis</i>       |   |   |     |
| <i>Sooglossus</i>         | 0 | 1 | 0   |
| <i>gardineri</i>          |   |   |     |
| <i>Sooglossus</i>         | 0 | 1 | 0   |
| <i>sechellensis</i>       |   |   |     |
| <i>Balebreviceps</i>      | 0 | 2 | 0   |
| <i>hillmani</i>           |   |   |     |
| <i>Callulina</i>          | 0 | 2 | 0   |
| <i>kisiwamsitu</i>        |   |   |     |
| <i>Probreviceps</i>       | 0 | 0 | 0   |
| <i>macrodactylus</i>      |   |   |     |
| <i>Spelaeophryne</i>      | 0 | 0 | 0   |
| <i>methneri</i>           |   |   |     |
| <i>Hemisis</i>            | 1 | 1 | 0   |
| <i>guineensis</i>         |   |   |     |
| <i>Kassinula wittei</i>   | 0 | 2 | 2   |
| <i>Nyctibates</i>         | 0 | 0 | 2   |
| <i>corrugatus</i>         |   |   |     |
| <i>Acanthixalus</i>       | 0 | 0 | 2   |
| <i>spinosus</i>           |   |   |     |
| <i>Astylosternus</i>      | 0 | 2 | 0   |
| <i>diadematus</i>         |   |   |     |
| <i>Arthroleptis bioko</i> | 0 | 2 | 0   |
| <i>Cardioglossa</i>       | 0 | 0 | 0   |
| <i>cyaneospila</i>        |   |   |     |
| <i>Leptodactylodon</i>    | 0 | 1 | 0   |
| <i>ovatus</i>             |   |   |     |
| <i>Trichobatrachus</i>    | 0 | 1 | 0   |
| <i>robustus</i>           |   |   |     |
| <i>Leptopelis</i>         | 0 | 0 | 2   |
| <i>brevirostris</i>       |   |   |     |
| <i>Leptopelis notatus</i> | 0 | 0 | 2   |
| <i>Otophrynae</i>         | 0 | 0 | 0   |
| <i>robusta</i>            |   |   |     |
| <i>Paedophrynae</i>       | 0 | 0 | 0   |
| <i>amauensis</i>          |   |   |     |
| <i>Synaptoranus</i>       | 0 | 1 | 0   |
| <i>mirandariberoi</i>     |   |   |     |
| <i>Uperodon systoma</i>   | 0 | 0 | 0   |
| <i>Syncope antenori</i>   | 1 | 0 | 0/2 |
| <i>Melanobatrachus</i>    | 1 | 1 | 0   |
| <i>indicus</i>            |   |   |     |

|                                   |   |   |   |
|-----------------------------------|---|---|---|
| <i>Chiasmocleis crucis</i>        | 1 | 0 | 0 |
| <i>Gastrophryne carolinensis</i>  | 1 | 1 | 0 |
| <i>Madecassophryne truebae</i>    | 0 | 1 | 0 |
| <i>Odontobatrachus natator</i>    | 0 | 1 | 1 |
| <i>Phrynobatrachus krefftii</i>   | 0 | 0 | 2 |
| <i>Hildebrandtia ornata</i>       | 0 | 1 | 0 |
| <i>Ptychadena oxyrhynchus</i>     | 0 | 1 | 0 |
| <i>Pyxicephalus adspersus</i>     | 0 | 1 | 0 |
| <i>Tomopterna delandii</i>        | 0 | 1 | 0 |
| <i>Arthroleptella lightfooti</i>  | 0 | 0 | 0 |
| <i>Cacosternum namaquense</i>     | 1 | 0 | 0 |
| <i>Cacosternum boettgeri</i>      | 1 | 0 | 0 |
| <i>Microbatrachella capensis</i>  | 0 | 1 | 0 |
| <i>Natalobatrachus bonebergi</i>  | 0 | 1 | 2 |
| <i>Conraua goliath</i>            | 0 | 0 | 1 |
| <i>Conraua crassipes</i>          | 0 | 1 | 1 |
| <i>Petropedetes cf.vulpiae</i>    | 0 | 0 | 2 |
| <i>Petropedetes sp.</i>           | 0 | 0 | 2 |
| <i>Cerathobatrachus guentheri</i> | 0 | 2 | 2 |
| <i>Cornufer guppyi</i>            | 0 | 2 | 0 |
| <i>Fejervarya limnocharis</i>     | 0 | 2 | 0 |
| <i>Limnonectes macrocephalus</i>  | 0 | 1 | 0 |
| <i>Limnonectes blythii</i>        | 0 | 2 | 0 |
| <i>Nyctibatrachus cf. aliciae</i> | 0 | 0 | 0 |
| <i>Nyctibatrachus major</i>       | 0 | 0 | 0 |
| <i>Rana capito</i>                | 0 | 1 | 0 |
| <i>Rana leptodctyla</i>           | 0 | 1 | 0 |
| <i>Lithobates clamitans</i>       | 0 | 1 | 0 |

|                           |   |   |   |
|---------------------------|---|---|---|
| <i>Occidozyga laevis</i>  | 0 | 1 | 0 |
| <i>Amnirana</i>           | 0 | 0 | 2 |
| <i>albolabris</i>         |   |   |   |
| <i>Indirana</i>           | 0 | 0 | 0 |
| <i>phrynoderma</i>        |   |   |   |
| <i>Boophis boehmei</i>    | 0 | 0 | 2 |
| <i>Buergeria japonica</i> | 0 | 1 | 2 |
| <i>Nyctixalus</i>         | 0 | 2 | 2 |
| <i>spinosus</i>           |   |   |   |
| <i>Nyctixalus pictus</i>  | 0 | 2 | 2 |
| <i>Philautus</i>          | 0 | 2 | 2 |
| <i>worcesteri</i>         |   |   |   |
| <i>Philautus surdus</i>   | 0 | 2 | 2 |
| <i>Philautus petersi</i>  | 0 | 2 | 2 |
| <i>Polypedates</i>        | 0 | 0 | 2 |
| <i>nigripunctatus</i>     |   |   |   |
| <i>Polypedates</i>        | 0 | 0 | 2 |
| <i>macrotis</i>           |   |   |   |
| <i>Raorchestes</i>        | 0 | 0 | 2 |
| <i>brimarrumpfi</i>       |   |   |   |
| <i>Raorchestes</i>        | 0 | 0 | 0 |
| <i>resplendens</i>        |   |   |   |
| <i>Rhacophorus</i>        | 0 | 0 | 2 |
| <i>catamitus</i>          |   |   |   |

Character matrix used in Mesquite 2.7 (Maddison and Maddison, 2019) through character mapping investigate the relationship between the palmar sesamoid, the carpal ventral surface, phylogeny, and the habitat use within the anuran groups.
