# Supplementary material for: An overview of the osseous palmar sesamoid in Anura, with the particular case of some Rhinella species
Source: PeerJ journal article supplement (doi:10.7717/peerj.15063), 2023-05-15
Supplement: SM4.pdf [file SM4.pdf]

| Family              | Taxon                          | Sesamoid                                                                                                                                                      | Carpals anatomy                                                                                                                                                                                                                                           | Morphosource data |
|---------------------|--------------------------------|---------------------------------------------------------------------------------------------------------------------------------------------------------------|-----------------------------------------------------------------------------------------------------------------------------------------------------------------------------------------------------------------------------------------------------------|-------------------|
| <b>Alytidae</b>     | <i>Leiopelma hamiltoni</i>     | Absent. There is a small sesamoid on the palmar surface of the manus, but located close to the metacarpal bones. It is not homologous to the palmar sesamoid. | Distal carpals seem to be absent, probably not mineralized (Stephenson, 1960), also the prepollex. There is a soft concavity on the ventral face of distal carpal 5, located distal to the ulnare. Ulnare squared, without process.                       | M13874-24295      |
| <b>Megophryidae</b> | <i>Leptobrachium hasseltii</i> | There is a palmar sesamoid flat and rounded, located over and between the protruded ventral faces of the distal carpal 3+4, and of the distal carpal 5.       | Distal carpal 3+4 is a large bone, also distal carpal 5. Each bone has a ventral protuberance, and together form a concavity that supports the sesamoid. Distal carpal 2 is small and rounded. The palmar carpal surface is concave in general (Fig. 2B). | M10832-16286      |

## Heleophryne

*Hadromophryne*

*natalensis*

The palmar sesamoid is elongated, oval and flat. Located oblique over the distal carpals 3, and 4+5.

The carpal distal 2 is cuboidal. Distal carpal 3, and carpal 4+5 with protuberances, forming a soft concavity where the palmar sesamoid fits. The ulnare is big, triangular, with a lateral crest. Radiale is also big and cuboidal (Fig. 2D). There is a hole on the medial side of the distal carpal 3+4+5, at the base of digit III.

M9316-12695

Myobatrachidae

*Crinia signifera*

This specimen exhibits a small and rounded palmar sesamoid, floating on the distal carpal 3+4+5 concavity. Only in the left manus.

The distal carpal 3+4+5 shows two parallel protuberances, forming a concavity in the palmar surface. The distal carpal 2 is small and rounded and located at the base of metacarpals 2 and 3.

M64730-116392

Hylodidae

*Crossodactylus  
trachystomus*

A large, flat, and oval palmar sesamoid is present, covering the depression of the distal carpal 3+4+5 concavity.

The distal carpal 3 +4+5 has two well-marked bulges, like crests, forming a concavity where the sesamoid fits. The distal carpal 2 is elongated, located at the large base of the metacarpus 2.

M13733-24014

*Crossodactylus  
gaudichaudii*

A large, flat, and oval palmar sesamoid is present, covering the depression of the distal carpal 3+4+5 concavity.

The distal carpal 3+4+5 protrudes with a soft concavity where the sesamoid fits. Distal carpal 2 is large and rounded. There is a small hole in the medial side of the distal carpal 3+4+5, at the base of digit III.

M20787-39539

Dendrobatidae

*Ameerega  
trivittata*

Palmar sesamoid oval and large, covering the soft concavity of the protruded distal carpal.

Distal carpal 3+4+5 with two protuberances that form the concavity where the palmar sesamoid is housed.

M15692-29052

|                                |                                                                                                                                                     |                                                                                                                                                                                                                   |               |
|--------------------------------|-----------------------------------------------------------------------------------------------------------------------------------------------------|-------------------------------------------------------------------------------------------------------------------------------------------------------------------------------------------------------------------|---------------|
| <i>Colostethus<br/>latinus</i> | Similar to <i>Ameerega</i> . Palmar sesamoid, oval and large, fits into the concavity of the distal carpal 3+4+5, adjoining the crest of the ulnare | Distal carpal 3+4+5 with two parallel crests that form the concavity where the palmar sesamoid is housed.                                                                                                         | M64056-115564 |
| <i>Oophaga pumilio</i>         | There is a flat, large, and triangular palmar sesamoid that fits partially into the concavity of the distal carpal 3+4+5.                           | The distal carpal 3+4+5, with two crests that form the concavity where the palmar sesamoid is housed. There is a hole in the medial side of the distal carpal 3+4+5, at the base of digit III.                    | M15470-28400  |
| <i>Phyllobates<br/>bicolor</i> | There is a flat and oval palmar sesamoid lying over the concavity formed by two parallel crests of the distal carpal 3+4+5.                         | The distal carpal 3+4+5, with two crests that form the concavity where the palmar sesamoid is housed. There is a hole in the medial side of the distal carpal 3+4+5, at the base of digit III. Element Y is large | M15469-28391  |

|                                   |                                                                                               |                                                                                                                                                                                                         |                                                                                                                                                                                                                                                                                                                             |                          |
|-----------------------------------|-----------------------------------------------------------------------------------------------|---------------------------------------------------------------------------------------------------------------------------------------------------------------------------------------------------------|-----------------------------------------------------------------------------------------------------------------------------------------------------------------------------------------------------------------------------------------------------------------------------------------------------------------------------|--------------------------|
| <i>Silverstoneia<br/>flotator</i> | There is a flat and oval palmar sesamoid lying over the concavity of the distal carpal 3+4+5. | The distal carpal 3+4+5 has two parallel crests that forma soft concavity where the palmar sesamoid is housed. There is a hole on the medial side of the distal carpal 3+4+5, at the base of digit III. | M63791-115217                                                                                                                                                                                                                                                                                                               |                          |
| Brachycephalidae                  | <i>Brachycephalus<br/>albolineatus</i>                                                        | The palmar sesamoid is located parallel to digit IV, elongated and small, lying over a soft concavity of the distal carpal 3+4+5.                                                                       | The distal carpal 3+4+5 is protruded, and presents two small parallel crests forming a soft concavity where the sesamoid is housed. There is a hole on the medial side of the distal carpal 3+4+5, at the base of digit III. There is a large hole in the medial side of the distal carpal 3+4+5, at the base of digit III. | MHNCI<br>10295M000014739 |

|                                 |                                                                                                                                   |                                                                                                                                                                                                                                                                                                                             |                          |
|---------------------------------|-----------------------------------------------------------------------------------------------------------------------------------|-----------------------------------------------------------------------------------------------------------------------------------------------------------------------------------------------------------------------------------------------------------------------------------------------------------------------------|--------------------------|
| <i>Brachycephalus coloratus</i> | The palmar sesamoid is located parallel to digit IV, elongated and small, lying over a soft concavity of the distal carpal 3+4+5. | The distal carpal 3+4+5 is protruded, and presents two small parallel crests forming a soft concavity where the sesamoid is housed. There is a hole on the medial side of the distal carpal 3+4+5, at the base of digit III. There is a large hole in the medial side of the distal carpal 3+4+5, at the base of digit III. | MHNCI<br>10274M000014739 |
| <i>Brachycephalus curupira</i>  | Small elongated, and pyramidal palmar sesamoid lying over a soft concavity of the distal carpal 3+4+5.                            | The distal carpal 3+4+5 is protruded and presents two soft parallel crests forming a concavity. There is a large hole in the medial side of the distal carpal 3+4+5, at the base of digit III.                                                                                                                              | M10229-14782             |
| <i>Brachycephalus ephippium</i> | The palmar sesamoid and a concavity in the palmar surface of the manus are present.                                               | The distal carpal 3+4+5 is protruded and presents two soft parallel crests.                                                                                                                                                                                                                                                 | M9209-12426              |

|                              |                                                                                                                                         |                                                                                                                                                                                                                 |                                                                                                                                                                                                                  |             |
|------------------------------|-----------------------------------------------------------------------------------------------------------------------------------------|-----------------------------------------------------------------------------------------------------------------------------------------------------------------------------------------------------------------|------------------------------------------------------------------------------------------------------------------------------------------------------------------------------------------------------------------|-------------|
| <i>Ischnocnema gualteri</i>  | The palmar sesamoid is elongated, large, and flat. It fits into the concavity formed by the two crests of the carpal 3+4+5.             | The distal carpal 3+4+5 is large, protruded, and presents two parallel protuberances/crests forming a concavity. There is a large hole in the medial side of the distal carpal 3+4+5, at the base of digit III. | M13015-22193                                                                                                                                                                                                     |             |
| <i>Ischnocnema quixensis</i> | The palmar sesamoid is large, oval, and flat. It fits into the soft concavity between the two protuberances/crests of the carpal 3+4+5. | The distal carpal 3+4+5 is large, protruded, and presents two parallel protuberances/crests forming a concavity. There is a large hole in the medial side of the distal carpal 3+4+5, at the base of digit III  | M13245-22890                                                                                                                                                                                                     |             |
| Craugastoridae               | <i>Craugastor laticeps</i>                                                                                                              | There is a palmar sesamoid triangular, flat, and large that fits in a soft and wide concavity of the carpal 3+4+5.                                                                                              | The distal carpal 3+4+5 is large, protruded, and presents two parallel protuberances forming a wide and soft concavity. There is a hole in the medial side of the distal carpal 3+4+5, at the base of digit III. | M9311-12670 |

Strabomantidae

*Barycholos  
pulcher*

A large, flat, and elongated  
palmar sesamoid is visible.  
But the carpus is destroyed.

The carpus is destroyed

M12275-20040

*Barycholos  
pulcher*

A large, oval, and elongated  
palmar sesamoid with a distal  
rounded head fits between the  
two parallel crests of the  
distal carpal 3+4+5. The  
proximal thinner part of the  
drop-shaped palmar sesamoid  
lies on the palm of the manus.

The distal carpal 3+4+5 is large,  
protruded, and presents two parallel  
crests forming a concavity. There is a  
small hole in the medial side of the distal  
carpal 3+4+5, at the base of digit III.

M14710-26382

Odontophrynidae

*Odontophrynus  
americanus*

There is a small oval, and  
elongated palmar sesamoid  
lying over a wide concavity  
of the distal carpal 3+4+5,  
between its two crests.

Distal carpal 3+4+5 has a wide concavity  
limited by two parallel crests. The ulnare  
and radiale are big and cuboidal bones.  
The element Y is also big. The distal  
carpal 2 is small.

M25346



|                 |                           |                                                                                                                                                                                                                                                                              |                                                                                                                                                                                                                                                      |              |
|-----------------|---------------------------|------------------------------------------------------------------------------------------------------------------------------------------------------------------------------------------------------------------------------------------------------------------------------|------------------------------------------------------------------------------------------------------------------------------------------------------------------------------------------------------------------------------------------------------|--------------|
| Leptodactylidae | <i>Adenomera andreae</i>  | There is a large, rectangular, and elongated palmar sesamoid, that fits partially in the concavity of the distal carpal 3+4+5, between the two parallel crests.                                                                                                              | Distal carpal 3+4+5 has two parallel crests that form a deep concavity. There is an elongated and rounded distal carpal 2. The element Y is also elongated and articulates with a two element formed prepollex. The ulnare bone has a ventral crest. | M9784-13750  |
| Bufoidea        | <i>Adenomus kelaartii</i> | A large and elongated palmar sesamoid with a rounded, wide distal extreme, that fits between the two parallel crests of the distal carpal 3+4+5. The proximal extreme is narrower and covers the palmar face of the manus. This form gives the palmar sesamoid a drop-shape. | The distal carpal 3+4+5 presents a narrow concavity limited by two parallel crests. Only the distal portion of the palmar sesamoid is over it. There is a hole in the medial side of the distal carpal 3+4+5, at the base of digit III.              | M14189-24953 |

*Anaxyrus  
fowleri*

A large and elongated palmar sesamoid with a rounded, wide distal extreme, that fits between the two parallel crests of the distal carpal 3+4+5. The proximal extreme is narrower and covers the palmar face of the manus. This form gives the palmar sesamoid a drop-shape.

The distal carpal 3+4+5 presents a concavity limited by two parallel crests.

M8870-11366

*Anaxyrus  
quercicus*

A large and elongated palmar sesamoid with a rounded, wide distal extreme, that fits between the two parallel crests of the distal carpal 3+4+5. The proximal extreme is narrower and covers the palmar face of the manus. This form gives the palmar sesamoid a drop-shape.

The distal carpal 3+4+5 presents a concavity limited by two parallel crests.

M8871-11372

|                            |                                                                                                                                                                                                                                                                                     |                                                                                                                                                                                                    |              |
|----------------------------|-------------------------------------------------------------------------------------------------------------------------------------------------------------------------------------------------------------------------------------------------------------------------------------|----------------------------------------------------------------------------------------------------------------------------------------------------------------------------------------------------|--------------|
| <i>Anaxyrus terrestris</i> | A large, oval, and elongated palmar sesamoid with a rounded, wide distal extreme, that fits between the two parallel crests of the distal carpal 3+4+5. The proximal extreme is narrower and covers the palmar face of the manus. This form gives the palmar sesamoid a drop-shape. | The distal carpal 3+4+5 presents a concavity but only the distal part of the palmar sesamoid is over it. There is a hole in the distal carpal 3+4+5, at the base of digit 3, is present and small. | M8872-11374  |
| <i>Ansonia mcgregori</i>   | A small and oval palmar sesamoid fits into a smooth concavity, between the two parallel crests of the distal carpal 3+4+5                                                                                                                                                           | Distal carpal 3+4+5 two parallel crests forming a concavity where palmar sesamoid fits. The hole in the distal carpal 3+4+5, at the base of digit 3, is present.                                   | M14201-24984 |

|                             |                                                                                                                              |                                                                                                                                                                                                       |             |
|-----------------------------|------------------------------------------------------------------------------------------------------------------------------|-------------------------------------------------------------------------------------------------------------------------------------------------------------------------------------------------------|-------------|
| <i>Atelopus ignescens</i>   | A oval and small palmar sesamoid fits into a smooth concavity, between the two parallel crests of the distal carpal 3+4+5    | Distal carpal 3+4+5 with a big protuberance. A big hole is visible in this protuberance, at the level of the base of digit III. Ulnare is cuboidal and big. A big and irregular element Y is evident. | M8902-11496 |
| <i>Atelopus oxyrhynchus</i> | A small and oval palmar sesamoid fits into the soft concavity, formed by the two parallel crests of the distal carpal 3+4+5. | Distal carpal 3+4+5 with a big protuberance. A big hole is visible in this protuberance, at the level of the base of digit III.                                                                       | M8869-11363 |

|                             |                                                                                                                                                                                                                                                                                                  |                                                                                                                                                                                                                                                                              |              |
|-----------------------------|--------------------------------------------------------------------------------------------------------------------------------------------------------------------------------------------------------------------------------------------------------------------------------------------------|------------------------------------------------------------------------------------------------------------------------------------------------------------------------------------------------------------------------------------------------------------------------------|--------------|
| <i>Capensibufo sp.</i>      | A large and elongated palmar sesamoid with a distal rounded head over the concavity between the two parallel crests of the distal carpal 3+4+5. The proximal extreme is narrower and extends over the palmar face of the manus. This form gives the palmar sesamoid an almost rectangular shape. | The distal carpal 3+4+5 presents a soft concavity limited by two parallel crests. The ulnare presents a ventral apophysis. The radiale is partially covered by the palmar sesamoid and articulates with the element Y.                                                       | M14385-25498 |
| <i>Duttaphrynus dodsoni</i> | A large and elongated palmar sesamoid with a distal rounded head over the concavity between the two parallel crests of the distal carpal 3+4+5. The proximal extreme is narrower and extends over the palmar face of the manus. This form gives the palmar sesamoid an almost cone shape.        | The distal carpal 3+4+5 presents a soft concavity limited by two low parallel crests. A small hole is evident at the base of digit III. The ulnare presents a ventral apophysis. The radiale is partially covered by the palmar sesamoid and articulates with the element Y. | M14411-25585 |

|                                    |                                                                                                                         |                                                                                                                                                                                          |              |
|------------------------------------|-------------------------------------------------------------------------------------------------------------------------|------------------------------------------------------------------------------------------------------------------------------------------------------------------------------------------|--------------|
| <i>Didynamipus<br/>sjostedi</i>    | An elongated and oval palmar sesamoid fits into the two parallel crests of the distal carpal 3+4+5.                     | Distal carpal 3+4+5 has two protuberances/crests that form a narrow concavity where the sesamoid is partially located.                                                                   | M13311-23005 |
| <i>Frostius<br/>pernambucensis</i> | The oval palmar sesamoid fits into the concavity of a ventrally protruded distal carpal 3+4+5.                          | Distal carpal 3+4+5 has a narrow concavity where the sesamoid is partially located. There is a large hole that faces the digit III, in the distal carpal.                                | M17368-32526 |
| <i>Laurentophryne<br/>parkeri</i>  | There is a rounded sesamoid that fits into the soft concavity formed by two parallel crests of the distal carpal 3+4+5. | Distal carpal 3+4+5 has a narrow concavity where the sesamoid is partially located. There is an oval hole in the distal carpal that faces the digit III. The ulnare has a ventral crest. | M17026-31690 |

|                                   |                                                                                                                                                                                                                                                |                                                                                                                                                                       |              |
|-----------------------------------|------------------------------------------------------------------------------------------------------------------------------------------------------------------------------------------------------------------------------------------------|-----------------------------------------------------------------------------------------------------------------------------------------------------------------------|--------------|
| <i>Melanophryniscus stelzneri</i> | This specimen presents two palmar overlapped oval sesamoids, one on top of the other, that fits into the two parallel crests of the distal carpal 3+4+5.                                                                                       | The distal carpal 3+4+5 has a narrow concavity limited by the two crests (Fig. 2E). There is an oval and large hole in the distal carpal that faces to the digit III. | M9213-12431  |
| <i>Mertensophryne micranotis</i>  | A big and rounded palmar sesamoid fits into the concavity formed by two parallel crests of the distal carpal 3+4+5.                                                                                                                            | The concavity formed by two parallel crests of the distal carpal 3+4+5 is narrow.                                                                                     | M14412-25588 |
| <i>Peltophryne guentheri</i>      | A large and triangular palmar sesamoid with a distal part over the concavity of the distal carpal 3+4+5. The proximal extreme is narrower and extends over the palmar face of the manus. This form gives the palmar sesamoid a triangle shape. | Distal carpal 3+4+5 with a wide concavity limited by the two parallel crests.                                                                                         | M8873-11379  |

|                |                            |                                                                                                                                   |                                                                                                                                                                   |              |
|----------------|----------------------------|-----------------------------------------------------------------------------------------------------------------------------------|-------------------------------------------------------------------------------------------------------------------------------------------------------------------|--------------|
|                | <i>Truebella skoptes</i>   | Small and drop-shaped palmar sesamoid that fits into the cavity of the distal carpal 3+4+5                                        | Distal carpal 3+4+5 with a narrow concavity limited by the two parallel crests. There is an oval and large hole in the distal carpal that faces to the digit III. | M20818-39601 |
|                | <i>Truebella tothastes</i> | Small and oval palmar sesamoid that fits into the two parallel crests of the distal carpal 3+4+5. Only evident in the left manus. | Distal carpal 3+4+5 with a concavity limited by the two parallel crests.                                                                                          | M20817-39599 |
| Cycloramphidae | <i>Cycloramphus asper</i>  | Rounded and flat palmar sesamoid fits into the soft concavity of the distal carpal 3+4+5.                                         | Distal carpal 3+4+5 has a soft concavity limited by two parallel crests                                                                                           | M13198-22882 |



|                     |                                |                                                                                              |                                                                                                                                                                            |              |
|---------------------|--------------------------------|----------------------------------------------------------------------------------------------|----------------------------------------------------------------------------------------------------------------------------------------------------------------------------|--------------|
|                     | <i>Zachaenus parvulus</i>      | Rounded and flat palmar sesamoid fits into the concavity of the distal carpal 3+4+5.         | Distal carpal 3+4+5 is small and protruded to the ventral surface of the manus. It has a concavity formed by two parallel crests that partially house the palmar sesamoid. | M13305-23008 |
| <b>Microhylidae</b> | <i>Syncope antenori</i>        | The small and rounded palmar sesamoid is housed in the concavity of the distal carpal 3+4+5. | Distal carpal 3+4+5 is protruded to the ventral surface of the manus. It has a wide concavity formed by two parallel crests that houses the palmar sesamoid.               | M11048-16850 |
|                     | <i>Melanobatrachus indicus</i> | A flat, oval and ventrally curved sesamoid fits into the distal carpal 3+4+5 concavity.      | Distal carpal 3+4+5 is protruded to the ventral surface of the manus. It has a narrow concavity formed by two parallel crests where the palmar sesamoid fits.              | M12125-19810 |

|                    |                                  |                                                                                                                             |                                                                                                                |              |
|--------------------|----------------------------------|-----------------------------------------------------------------------------------------------------------------------------|----------------------------------------------------------------------------------------------------------------|--------------|
|                    | <i>Chiasmocleis crucis</i>       | A flat, irregular-shaped and ventrally curved sesamoid fits into the distal carpal 3+4+5 concavity.                         | Distal carpal 3+4+5 has a concavity formed by two parallel crests where the palmar sesamoid fits.              | M13915-24429 |
|                    | <i>Gastrophryne carolinensis</i> | A small and elongated palmar sesamoid located over the soft concavity of the distal carpal 3+4+5.                           | Distal carpal 3+4+5 has a wide and soft concavity limited by two parallel crests.                              | M12302-20081 |
| <b>Hemisotidae</b> | <i>Hemisis guineensis</i>        | A large, square, and flat palmar sesamoid that lies on the protruded ventral surface of the distal carpal 3+4+5 (Fig. 2 A). | Distal carpal 3+4+5 has a wide and soft concavity on its ventral surface. No crests/protuberances are evident. | M15807       |

|                       |                                |                                                                                         |                                                                                                                                                            |              |
|-----------------------|--------------------------------|-----------------------------------------------------------------------------------------|------------------------------------------------------------------------------------------------------------------------------------------------------------|--------------|
| <b>Pyxicephalidae</b> | <i>Cacosternum boettgeri</i>   | A small and oval palmar sesamoid, fits into the concavity of distal carpal 3+4+5.       | Distal carpal 3+4+5 has a narrow concavity limited by two parallel crests that house the palmar sesamoid. A small hole is evident at the base of digit III | M13936-24502 |
|                       | <i>Cacosternum namaquensis</i> | An oval palmar sesamoid, fits into the two protruded crests of the distal carpal 3+4+5. | Distal carpal 3+4+5 has a narrow concavity limited by two parallel crests that house the palmar sesamoid. A small hole is evident at the base of digit III | M13937-25450 |

**SM4.** Morphological descriptions of the ventral surface of the manus of species downloaded from Morphosource CT images. We selected those species that have a bony palmar sesamoid and described it and the distal carpal anatomical context. Some details were included to extend the usefulness of our data to anatomists working in other topics.
